# Supplementary material for: Dose–Response Relationship of Outdoor Exposure and Myopia Indicators: A Systematic Review and Meta-Analysis of Various Research Methods
Source: PubMed Central journal article supplement (PMC6678505; doi:10.3390/ijerph16142595), 2019-07-21
Supplement: ijerph-16-02595-s001.pdf [file ijerph-16-02595-s001.pdf]

**SUPPLEMENTARY MATERIAL**

**Table.S1.** Assessment of methodological quality for cross-sectional studies.

| Author, year           | Selection | Comparability | Exposure/Outcome | Total scores |
|------------------------|-----------|---------------|------------------|--------------|
| Zhou et al., 2014 [33] | ****      | *             | ***              | 8/10         |
| Zhou et al., 2015 [34] | ****      | *             | ***              | 9/10         |
| Guo et al., 2013 [16]  | ****      | *             | ***              | 8/10         |
| Ip et al., 2008 [31]   | ****      | *             | ***              | 8/10         |

**Table.S2.** Assessment of methodological quality for cohort studies.

| Author, year                 | Selection | Comparability | Exposure/Outcome | Total scores |
|------------------------------|-----------|---------------|------------------|--------------|
| French et al. 2013 [35]      | ***       | *             | ***              | 7/9          |
| Guggenheim et al., 2012 [15] | ***       | *             | ***              | 7/9          |
| Jones et al., 2007 [12]      | ***       | *             | **               | 6/9          |

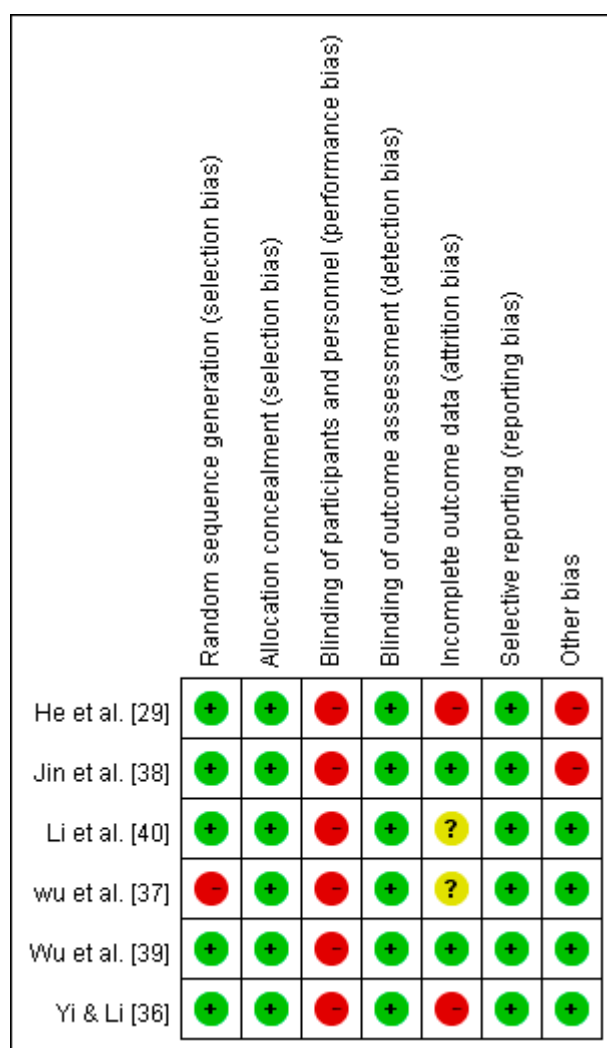

**Figure.S1.** Risk of bias summary for intervention studies.

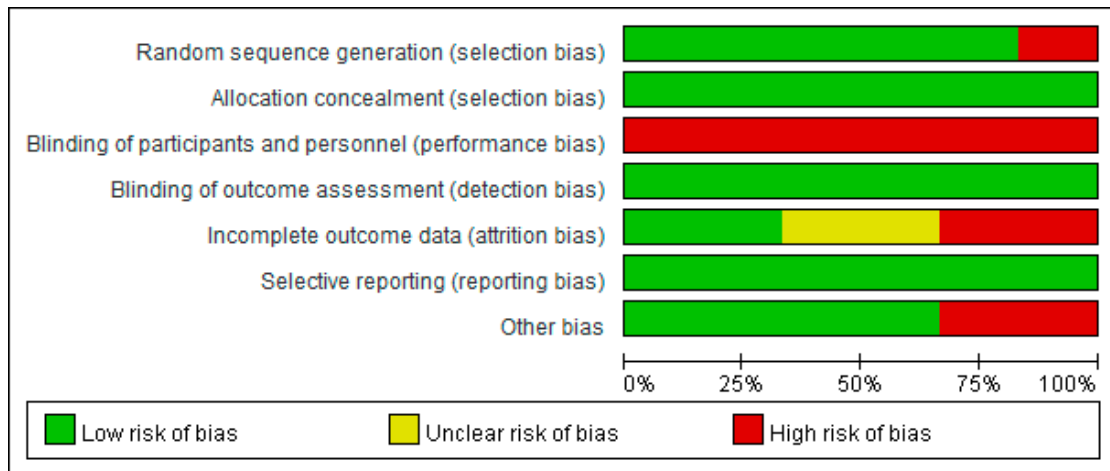

**Figure.S2.** Risk of bias chart for intervention studies.
